# Supplementary material for: Distinct ErbB2 receptor populations differentially interact with beta1 integrin in breast cancer cell models
Source: PubMed Central journal article supplement (PMC5357064; doi:10.1371/journal.pone.0174230), 2017-03-17
Supplement: pone.0174230.s001.pdf [file pone.0174230.s001.pdf]

|                | MCF7 ErbB2-TagRFP |         |      |      | SKBR3   |         |      |      | A4-HeLa |         |      |      | HC11 ErbB2-mYFP beta1 integrin-ECFP |         |      |      |
|----------------|-------------------|---------|------|------|---------|---------|------|------|---------|---------|------|------|-------------------------------------|---------|------|------|
|                | Pearson           | Manders | M1   | M2   | Pearson | Manders | M1   | M2   | Pearson | Manders | M1   | M2   | Pearson                             | Manders | M1   | M2   |
|                | 0.14              | 0.22    | 0.00 | 0.00 | 0.21    | 0.27    | 0.00 | 0.01 | 0.42    | 0.49    | 0.09 | 0.09 | 0.52                                | 0.57    | 0.23 | 0.21 |
|                | 0.20              | 0.26    | 0.00 | 0.01 | 0.12    | 0.16    | 0.00 | 0.00 | 0.69    | 0.74    | 0.27 | 0.32 | 0.48                                | 0.51    | 0.18 | 0.19 |
|                | 0.12              | 0.16    | 0.00 | 0.00 | 0.21    | 0.28    | 0.00 | 0.00 | 0.73    | 0.75    | 0.21 | 0.32 | 0.33                                | 0.42    | 0.00 | 0.00 |
|                | 0.07              | 0.13    | 0.00 | 0.00 | 0.11    | 0.18    | 0.00 | 0.00 | 0.53    | 0.58    | 0.25 | 0.35 | 0.32                                | 0.38    | 0.00 | 0.00 |
|                | 0.25              | 0.29    | 0.02 | 0.04 | 0.07    | 0.13    | 0.00 | 0.00 | 0.48    | 0.54    | 0.12 | 0.19 | 0.54                                | 0.59    | 0.25 | 0.41 |
|                | 0.15              | 0.20    | 0.00 | 0.00 | 0.09    | 0.22    | 0.00 | 0.00 | 0.69    | 0.71    | 0.30 | 0.30 | 0.27                                | 0.32    | 0.00 | 0.00 |
|                | 0.24              | 0.28    | 0.00 | 0.00 | 0.22    | 0.29    | 0.00 | 0.01 | 0.38    | 0.43    | 0.12 | 0.16 | 0.62                                | 0.65    | 0.43 | 0.43 |
|                | 0.24              | 0.27    | 0.00 | 0.00 | 0.16    | 0.24    | 0.00 | 0.01 | 0.45    | 0.51    | 0.07 | 0.04 | 0.51                                | 0.56    | 0.06 | 0.12 |
|                | 0.12              | 0.19    | 0.00 | 0.00 | 0.18    | 0.29    | 0.00 | 0.00 | 0.55    | 0.58    | 0.19 | 0.21 | 0.69                                | 0.75    | 0.36 | 0.29 |
|                | 0.20              | 0.26    | 0.00 | 0.00 | 0.14    | 0.21    | 0.00 | 0.01 | 0.47    | 0.54    | 0.19 | 0.10 | 0.56                                | 0.80    | 0.21 | 0.23 |
|                | 0.14              | 0.22    | 0.00 | 0.00 | 0.16    | 0.25    | 0.00 | 0.00 | 0.67    | 0.72    | 0.21 | 0.19 | 0.60                                | 0.72    | 0.21 | 0.15 |
|                | 0.19              | 0.24    | 0.00 | 0.00 | 0.22    | 0.32    | 0.00 | 0.00 | 0.70    | 0.84    | 0.47 | 0.38 | 0.35                                | 0.46    | 0.00 | 0.00 |
|                | 0.13              | 0.19    | 0.00 | 0.00 | 0.22    | 0.33    | 0.01 | 0.04 | 0.61    | 0.60    | 0.25 | 0.28 | 0.34                                | 0.35    | 0.00 | 0.00 |
|                | 0.29              | 0.34    | 0.00 | 0.00 | 0.42    | 0.48    | 0.03 | 0.15 | 0.76    | 0.81    | 0.50 | 0.45 | 0.62                                | 0.65    | 0.22 | 0.33 |
|                | 0.20              | 0.31    | 0.00 | 0.00 | 0.30    | 0.38    | 0.00 | 0.02 | 0.72    | 0.85    | 0.37 | 0.41 | 0.48                                | 0.51    | 0.04 | 0.06 |
|                | 0.21              | 0.26    | 0.00 | 0.00 | 0.28    | 0.32    | 0.01 | 0.12 | 0.64    | 0.67    | 0.27 | 0.19 |                                     |         |      |      |
|                | 0.05              | 0.10    | 0.00 | 0.00 | 0.14    | 0.16    | 0.00 | 0.02 | 0.71    | 0.75    | 0.40 | 0.38 |                                     |         |      |      |
|                | 0.16              | 0.25    | 0.01 | 0.00 | 0.07    | 0.09    | 0.00 | 0.00 | 0.51    | 0.60    | 0.29 | 0.32 |                                     |         |      |      |
|                | 0.23              | 0.30    | 0.03 | 0.03 | 0.09    | 0.13    | 0.00 | 0.00 | 0.59    | 0.54    | 0.20 | 0.26 |                                     |         |      |      |
|                | 0.25              | 0.31    | 0.00 | 0.01 | 0.08    | 0.11    | 0.00 | 0.00 | 0.51    | 0.54    | 0.21 | 0.32 |                                     |         |      |      |
|                | 0.22              | 0.27    | 0.01 | 0.01 | 0.41    | 0.43    | 0.02 | 0.07 | 0.35    | 0.45    | 0.09 | 0.06 |                                     |         |      |      |
|                | 0.23              | 0.31    | 0.00 | 0.00 | 0.11    | 0.15    | 0.00 | 0.00 | 0.43    | 0.49    | 0.05 | 0.03 |                                     |         |      |      |
|                | 0.22              | 0.27    | 0.02 | 0.02 | 0.10    | 0.13    | 0.00 | 0.00 | 0.63    | 0.62    | 0.27 | 0.30 |                                     |         |      |      |
| <b>Average</b> | 0.18              | 0.25    | 0.00 | 0.01 | 0.18    | 0.24    | 0.00 | 0.02 | 0.57    | 0.62    | 0.23 | 0.25 | 0.48                                | 0.55    | 0.15 | 0.16 |
| <b>SD</b>      | 0.06              | 0.06    | 0.01 | 0.01 | 0.10    | 0.10    | 0.01 | 0.04 | 0.12    | 0.13    | 0.12 | 0.12 | 0.13                                | 0.15    | 0.14 | 0.15 |
| <b>n</b>       | 23                | 23      | 23   | 23   | 23      | 23      | 23   | 23   | 23      | 23      | 23   | 23   | 15                                  | 15      | 15   | 15   |
| <b>SEM</b>     | 0.01              | 0.01    | 0.00 | 0.00 | 0.02    | 0.02    | 0.00 | 0.01 | 0.03    | 0.03    | 0.03 | 0.03 | 0.03                                | 0.04    | 0.04 | 0.04 |

**Fig S1. Quantification of ErbB2 and beta1 integrin colocalization.**

Quantification of Pearson's correlation, Manders' overlap, M1 and M2 coefficients of individual images of MCF7, SKBR3, A4-HeLa and HC11 cells cotransfected with beta1 integrin-ECFP-shRNA and ErbB2-mYFP plasmids.
